# Supplementary material
Source: PubMed Central journal article supplement (PMC6440235)
Supplement: jamafacialplastsurg-21-32-s001.pdf [file jamafacialplastsurg-21-32-s001.pdf]

## Supplementary Online Content

van Veen MM, Tavares-Brito J, van Veen BM, et al. Regional facial grading items in facial palsy–related assessment of quality of life. *JAMA Facial Plast Surg*. Published online August 16, 2018. doi:10.1001/jamafacial.2018.0804

**eFigure 1.** Scatterplot of eFACE and FaCE Scale Total Scores for the Flaccid Group

**eFigure 2.** Scatterplot of eFACE and FaCE Scale Total Scores for the Nonflaccid Group

**eFigure 3.** Relative Weights of Individual eFACE Items to FaCE Scale Total Score

This supplementary material has been provided by the authors to give readers additional information about their work.

**eFigure 1.** Scatterplot of eFACE and FaCE Scale Total Scores for the Flaccid Group

$R^2 = 0.212$ ;  $P < .001$

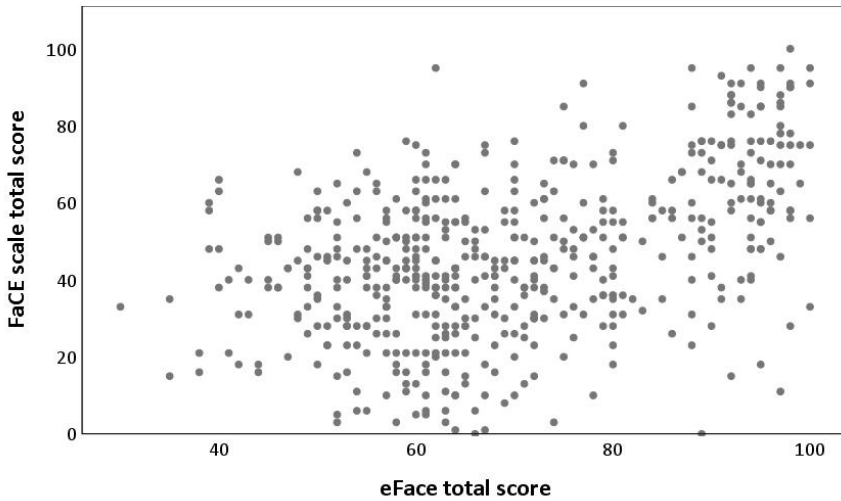

**eFigure 2.** Scatterplot of eFACE and FaCE Scale Total Scores for the Nonflaccid Group

$R^2 = 0.139$ ;  $P < .001$

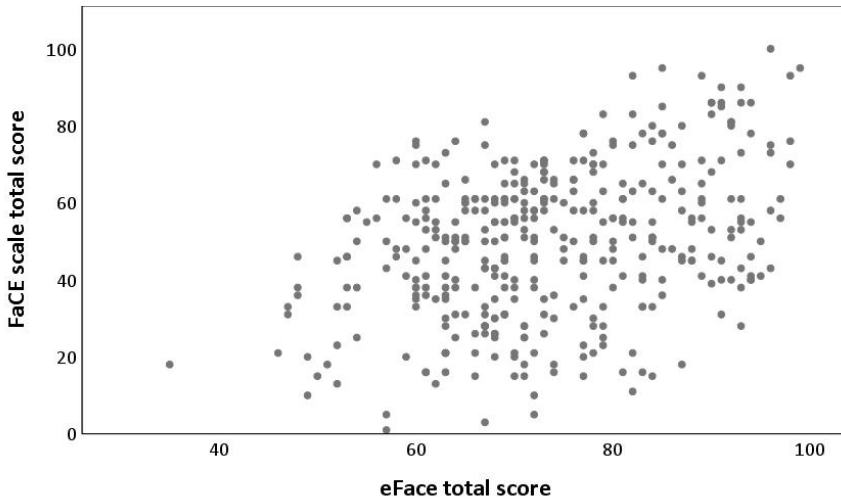

eFigure 3. Relative Weights of Individual eFACE Items to FaCE Scale Total Score

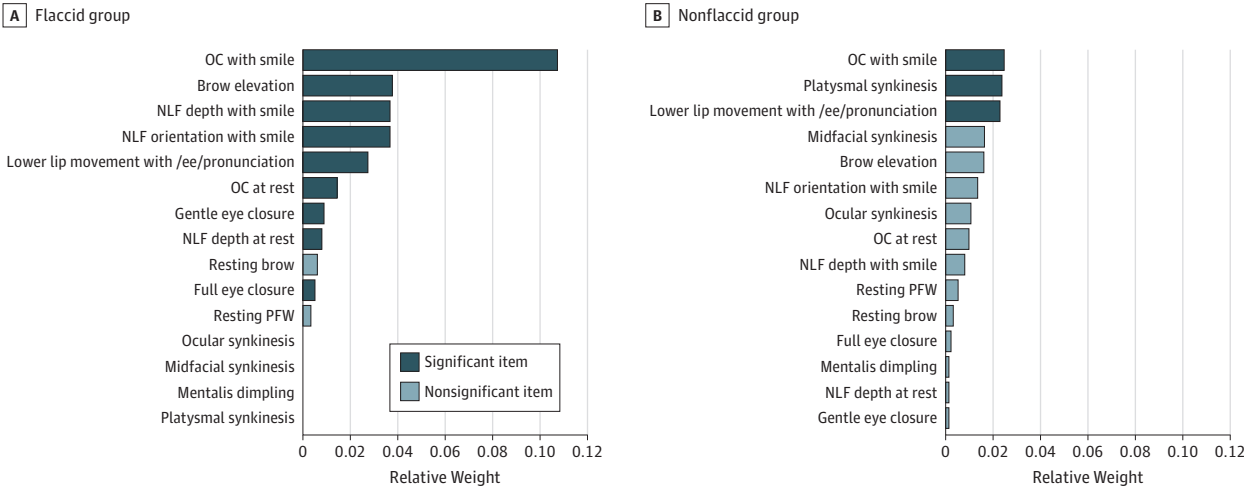

FaCE indicates Facial Clinimetric Evaluation; NLF, nasolabial fold; OC, oral commissure; and PFW, palbebral fissure width. Significant items are presented in dark blue, non-significant items in light blue.
